# Supplementary material
Source: Royal Society of Chemistry journal article supplement (doi:10.1039/d6se00159a)
Supplement: d6se00159a1.pdf [file d6se00159a1.pdf]

## Supplementary Information

### Self-standing porous intermetallic Fe<sub>3</sub>Mn<sub>7</sub> phase as bifunctional electrocatalyst towards efficient overall water splitting

Yan Wen,<sup>\*a</sup> Yu Cao,<sup>b</sup> Yufei Ren <sup>c</sup> and Zhen Huo <sup>\*d</sup>

<sup>a</sup> Faculty of Chemical Engineering and Energy Technology, Shanghai Institute of Technology, Shanghai 201418, China

<sup>b</sup> Shanxi Zihuan Technology Co., Ltd., Taiyuan 030021, China

<sup>c</sup> School of Information and Communication Engineering, Hainan University, Haikou 570228, China

<sup>d</sup> Desion Engineering Company, China Chemical Engineering Second Construction Corporation, Taiyuan 030021, China

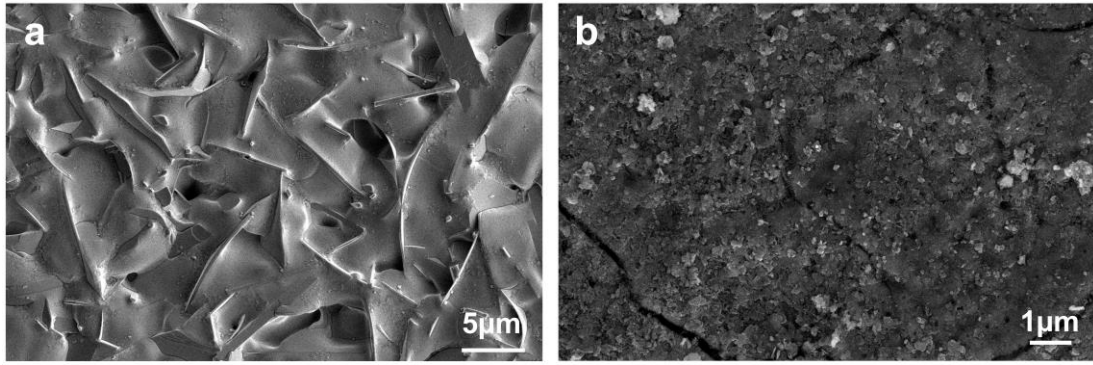

Fig. S1 SEM images of (a)D-MnNiFe-0 and (b) D-MnNiFe-60.

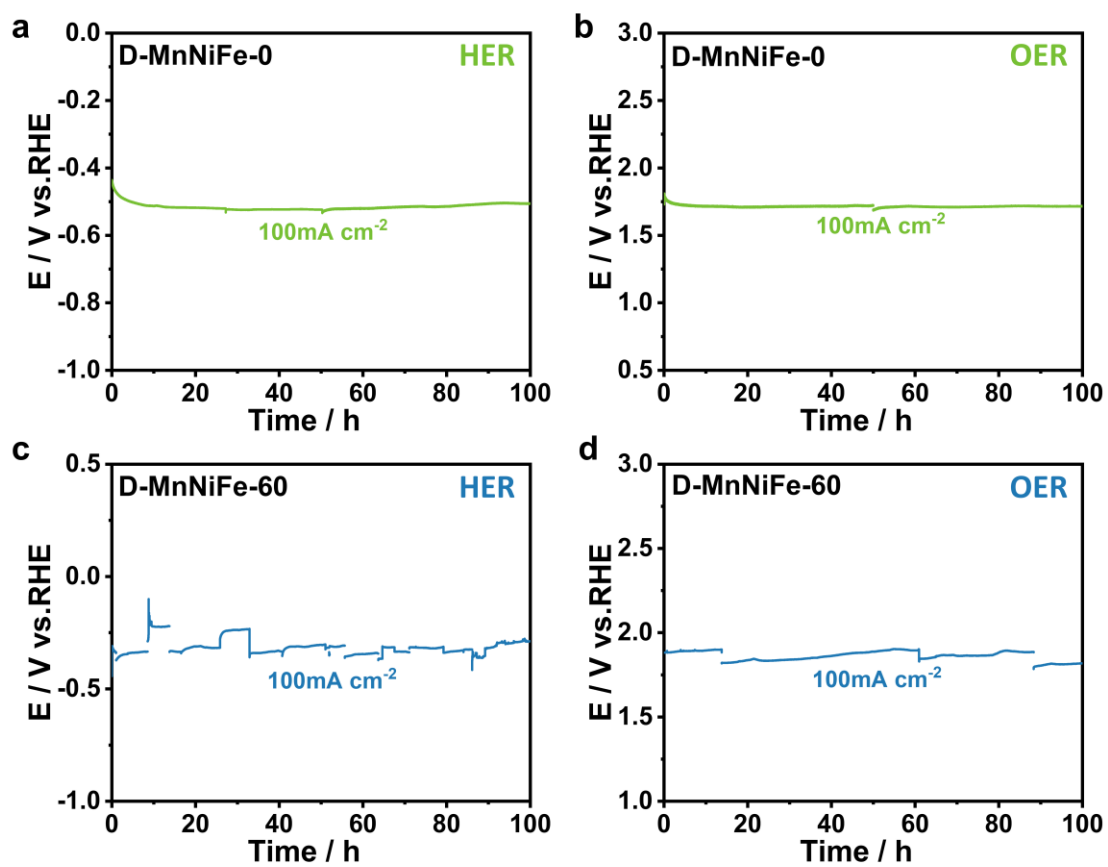

Fig. S2 CP profile of D-MnNiFe-0 and D-MnNiFe-60 for (a, c) HER and (b, d) OER at 100 mA cm<sup>-2</sup> in 1.0 M KOH.

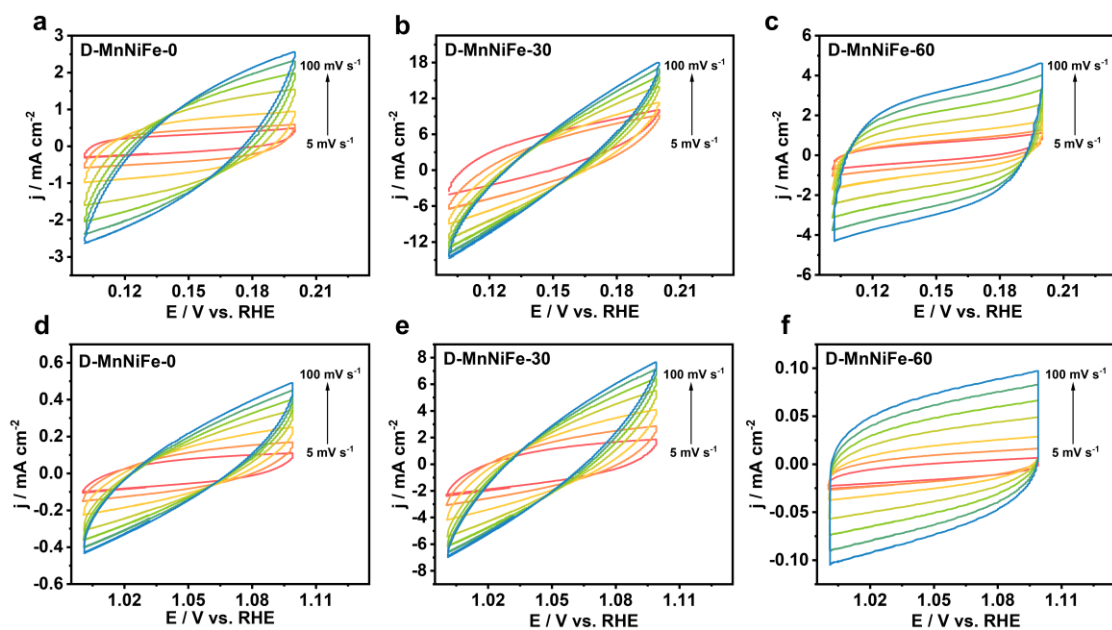

Fig. S3 CV curves for HER (0.1~0.2 V vs. RHE) of (a) D-MnNiFe-0, (b) D-MnNiFe-30 and (c) D-MnNiFe-60 electrodes under different scan rates; CV curves for OER (1.0~1.1 V vs. RHE) of (d) D-MnNiFe-0, (e) D-MnNiFe-30 and (f) D-MnNiFe-60 electrodes under different scan rates.

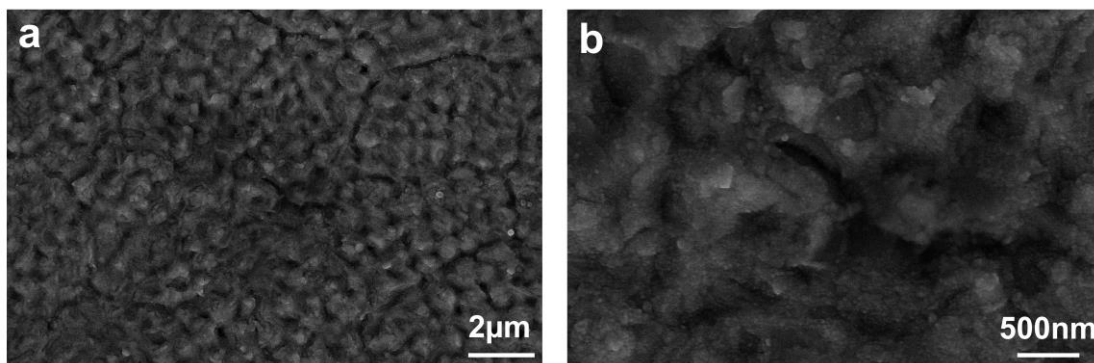

Fig. S4 (a) Low- and (b) high-magnification SEM images after stability testing in symmetric D-MnNiFe-30 || D-MnNiFe-30 electrodes

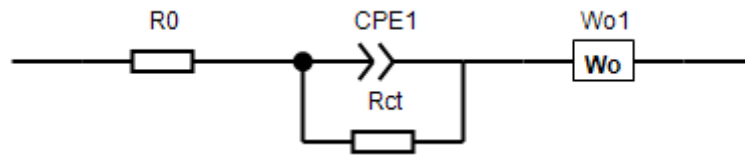

Fig. S5 Equivalent circuit diagram of EIS

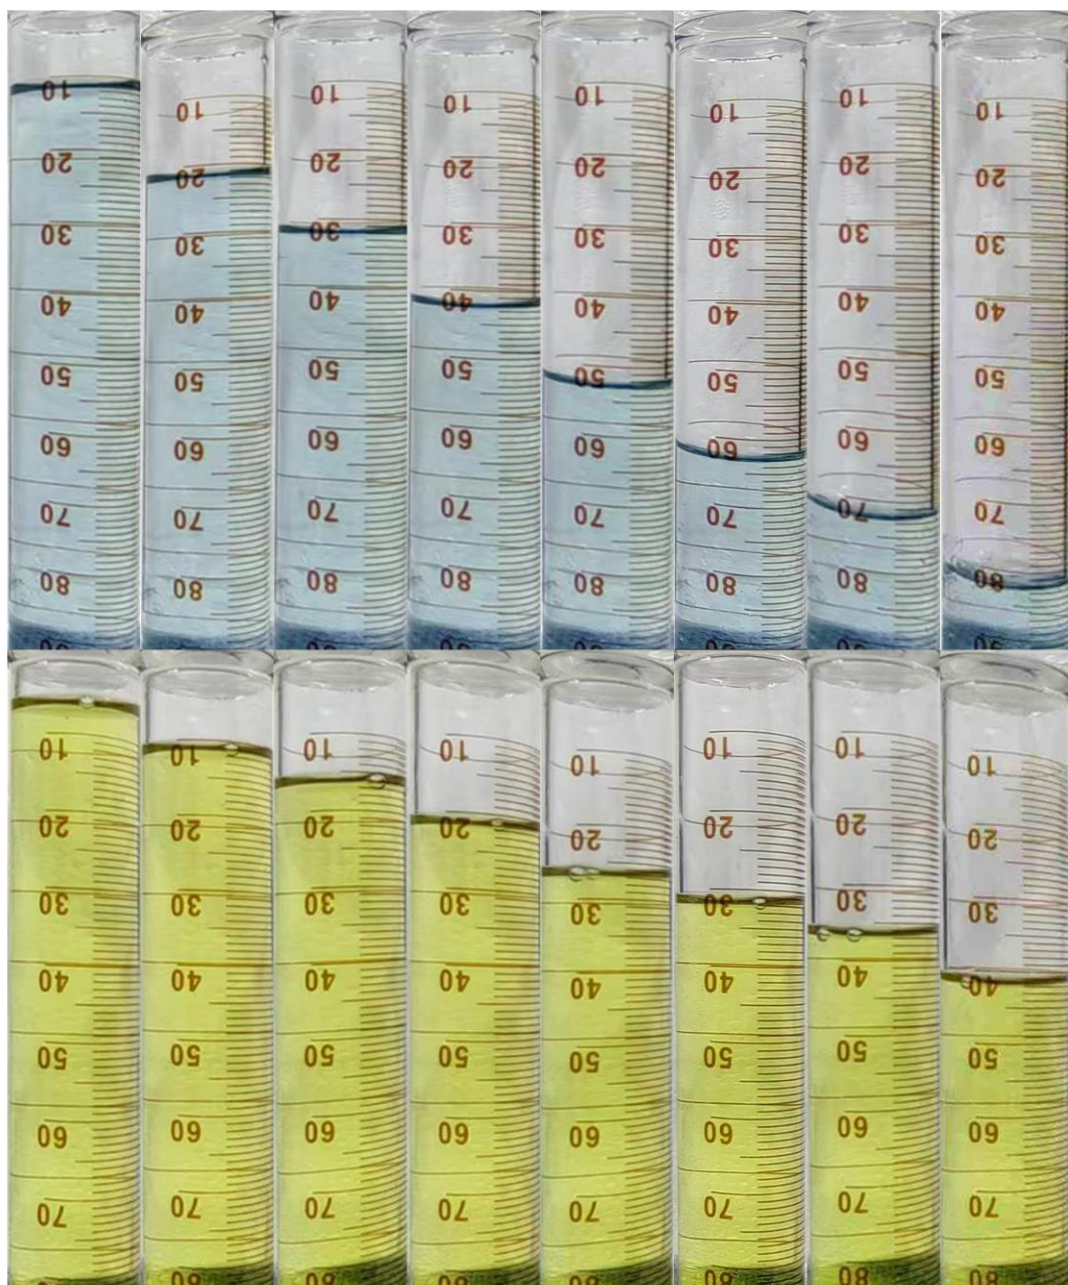

Fig. S6 photographs of H<sub>2</sub> (top) and O<sub>2</sub> (down) collected at 2 V for 80 min.

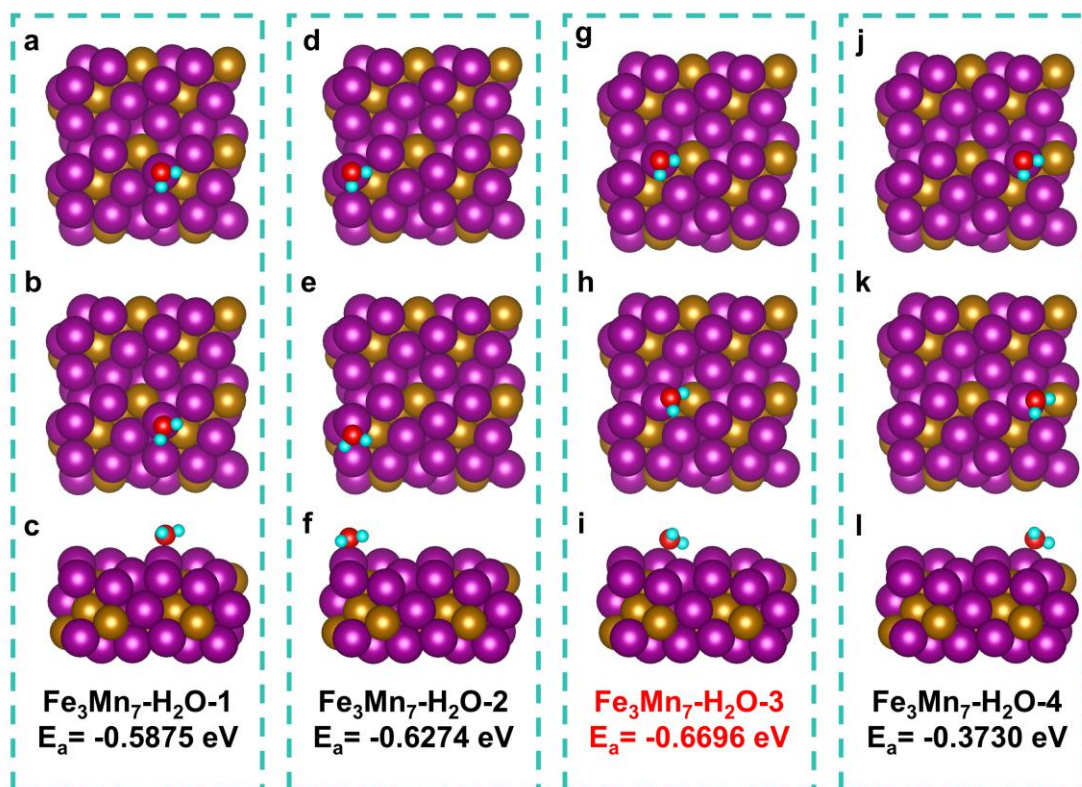

Fig. S7 (a, d, g, j) \*H<sub>2</sub>O adsorption models of Fe<sub>3</sub>Mn<sub>7</sub> on different metal sites. (b, e, h, k) Top view of optimized \*H<sub>2</sub>O adsorption models. (c, f, i, l) Front view and corresponding adsorption energies of optimized \*H<sub>2</sub>O adsorption models.

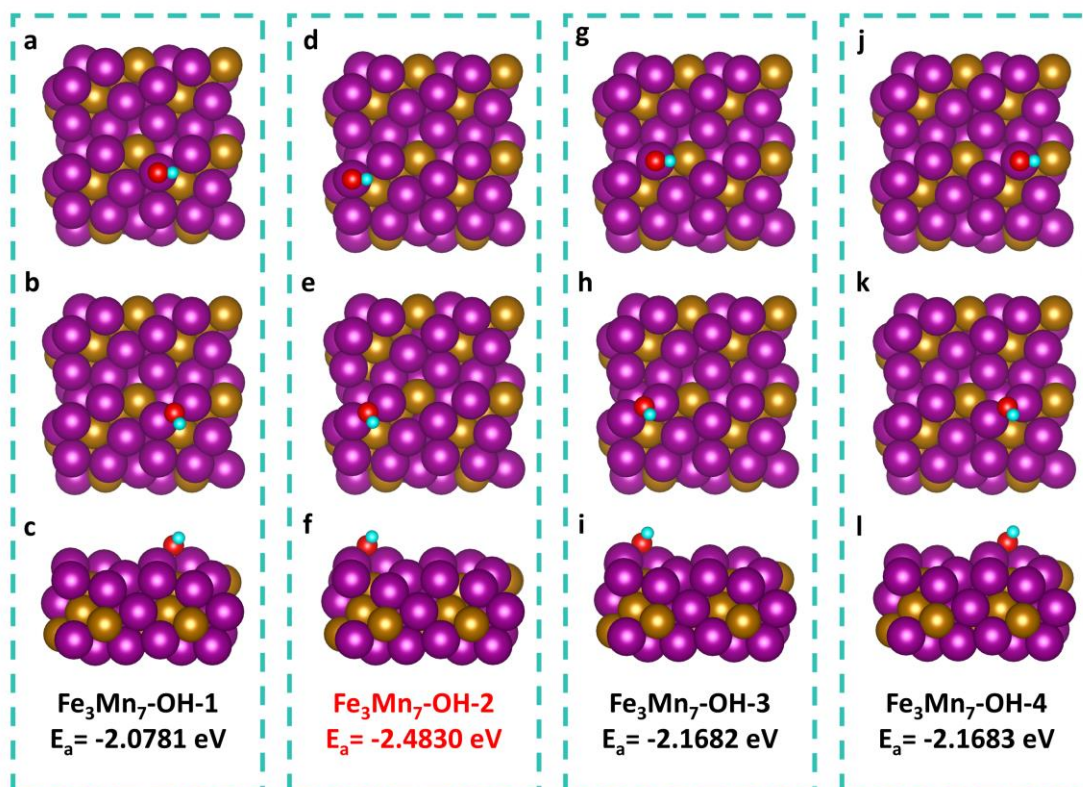

Fig. S8 (a, d, g, j) \*OH adsorption models of Fe<sub>3</sub>Mn<sub>7</sub> on different metal sites. (b, e, h, k) Top view of optimized \*OH adsorption models. (c, f, i, l) Front view and corresponding adsorption energies of optimized \*OH adsorption models.

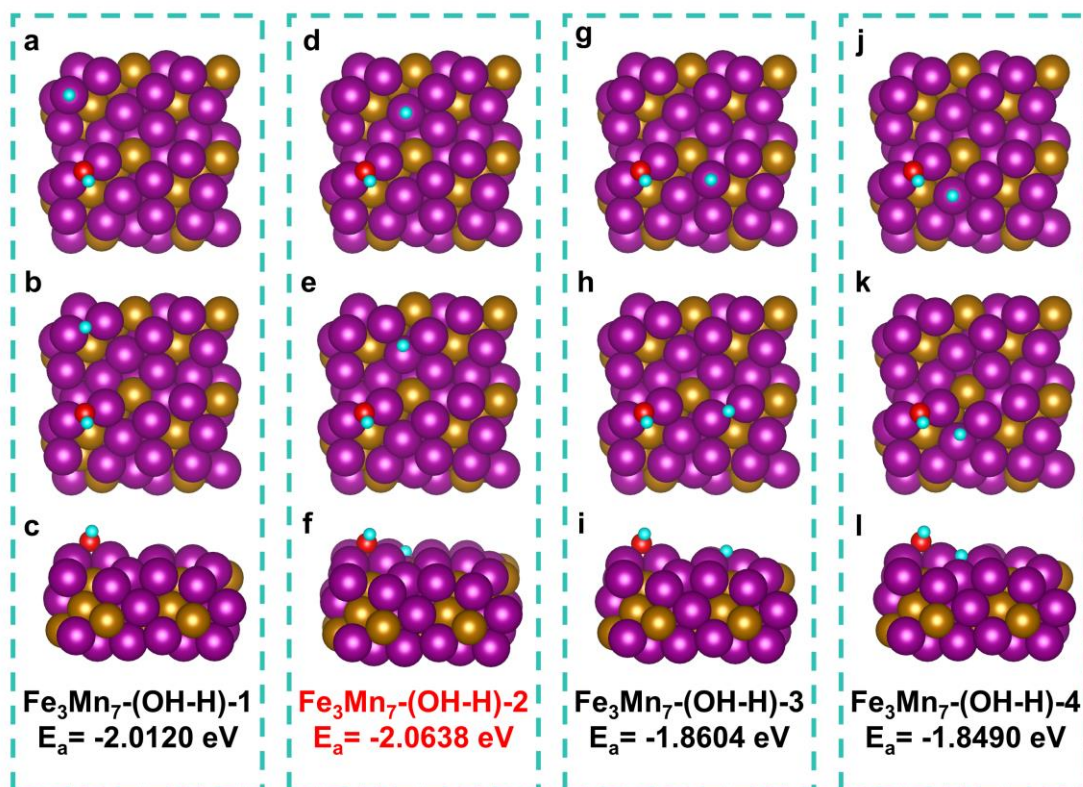

Fig. S9 (a, d, g, j) \*(OH-H) adsorption models of Fe<sub>3</sub>Mn<sub>7</sub> on different metal sites. (b, e, h, k) Top view of optimized \*(OH-H) adsorption models. (c, f, i, l) Front view and corresponding adsorption energies of optimized \*(OH-H) adsorption models.

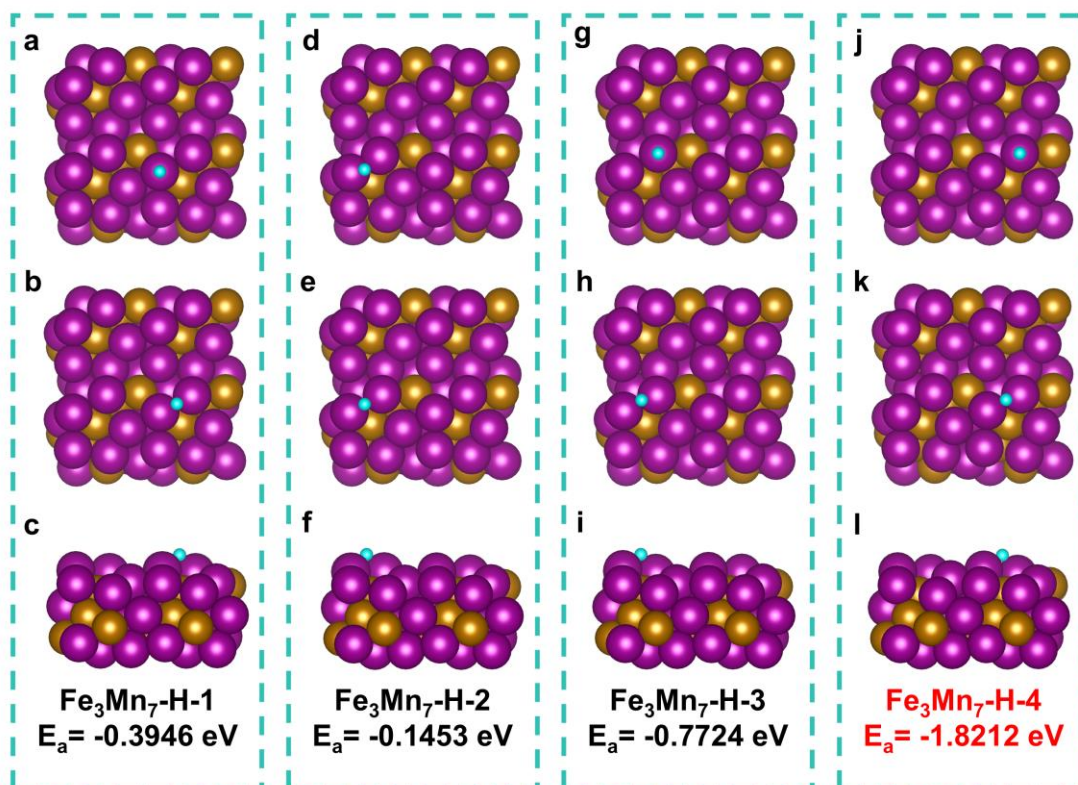

Fig. S10 (a, d, g, j) \*H adsorption models of  $\text{Fe}_3\text{Mn}_7$  on different metal sites. (b, e, h, k) Top view of optimized \*H adsorption models. (c, f, i, l) Front view and corresponding adsorption energies of optimized \*H adsorption models.

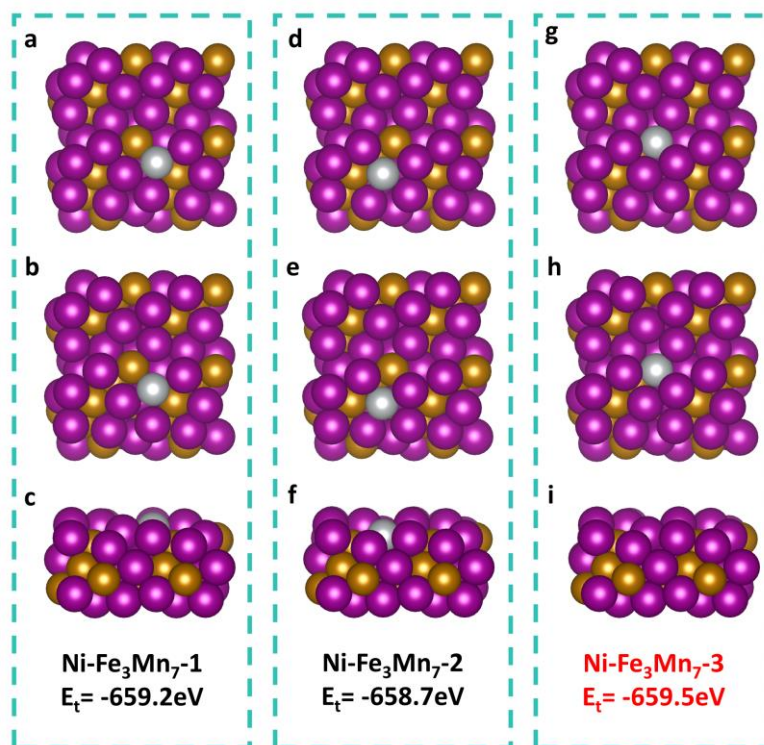

Fig. S11 (a, d, g) Top view of Ni-Fe<sub>3</sub>Mn<sub>7</sub> models. (b, e, h) Top view of optimized Ni-Fe<sub>3</sub>Mn<sub>7</sub> models. (c, f, i) Front view of optimized Ni-Fe<sub>3</sub>Mn<sub>7</sub> models and corresponding total energies.

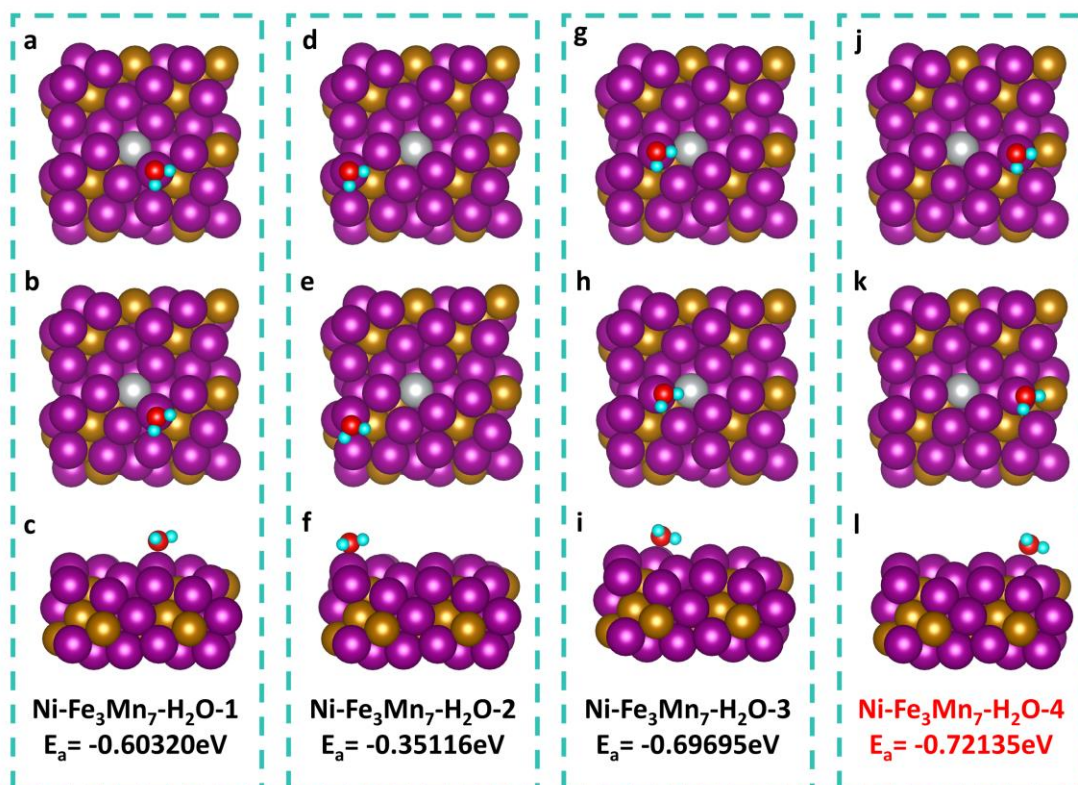

Fig. S12 (a, d, g, j) \*H<sub>2</sub>O adsorption models of Ni-Fe<sub>3</sub>Mn<sub>7</sub> on different metal sites. (b, e, h, k) Top view of optimized \*H<sub>2</sub>O adsorption models. (c, f, i, l) Front view and corresponding adsorption energies of optimized \*H<sub>2</sub>O adsorption models.

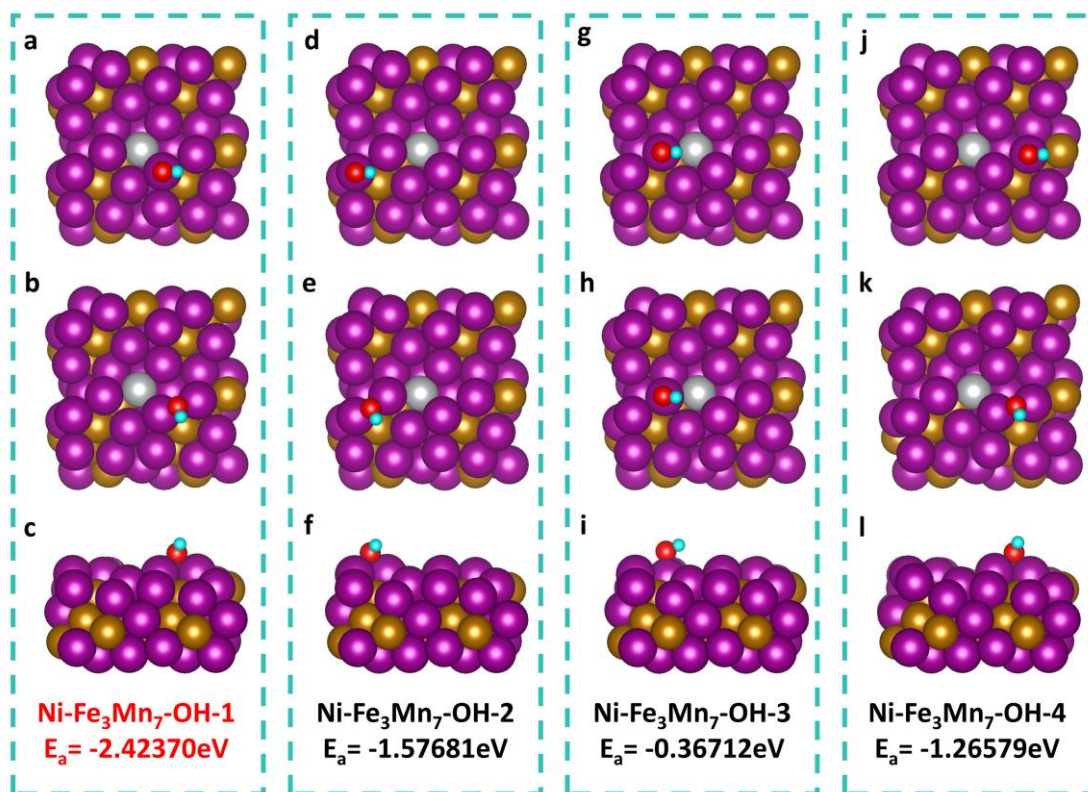

Fig. S13 (a, d, g, j) \*OH adsorption models of Ni-Fe<sub>3</sub>Mn<sub>7</sub> on different metal sites. (b, e, h, k) Top view of optimized \*OH adsorption models. (c, f, i, l) Front view and corresponding adsorption energies of optimized \*OH adsorption models.

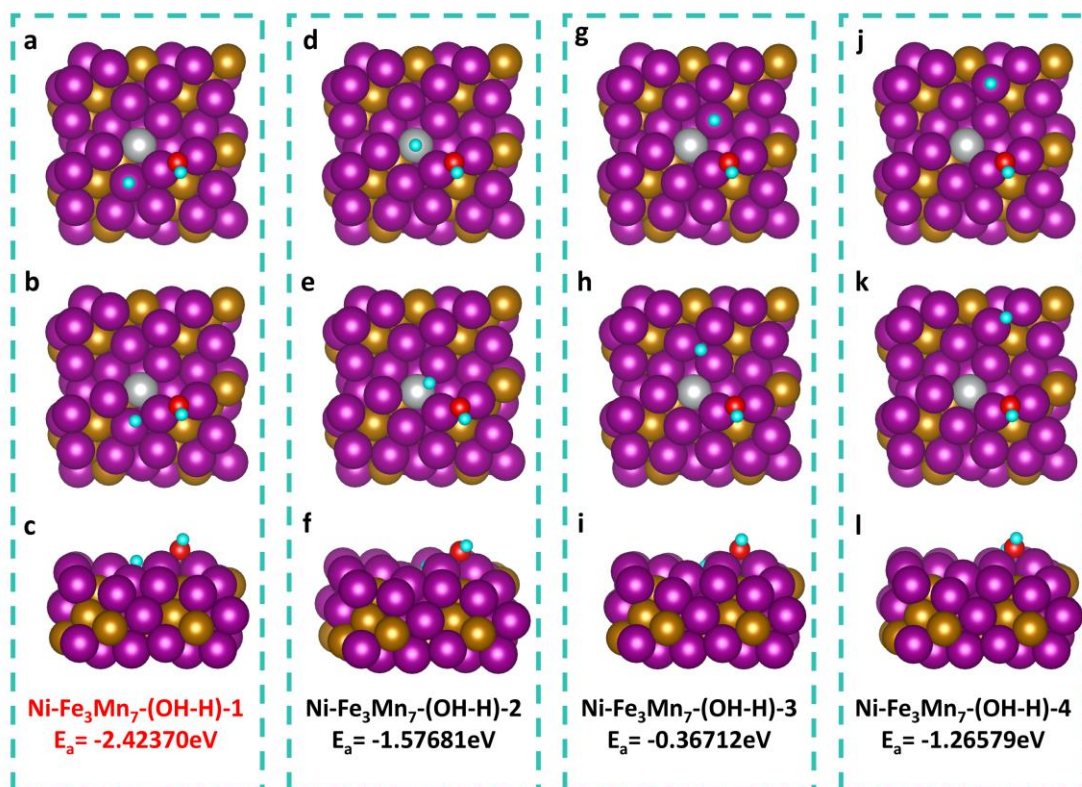

Fig. S14 (a, d, g, j) \*(OH-H) adsorption models of Ni-Fe<sub>3</sub>Mn<sub>7</sub> on different metal sites. (b, e, h, k) Top view of optimized \*(OH-H) adsorption models. (c, f, i, l) Front view and corresponding adsorption energies of optimized \*(OH-H) adsorption models.

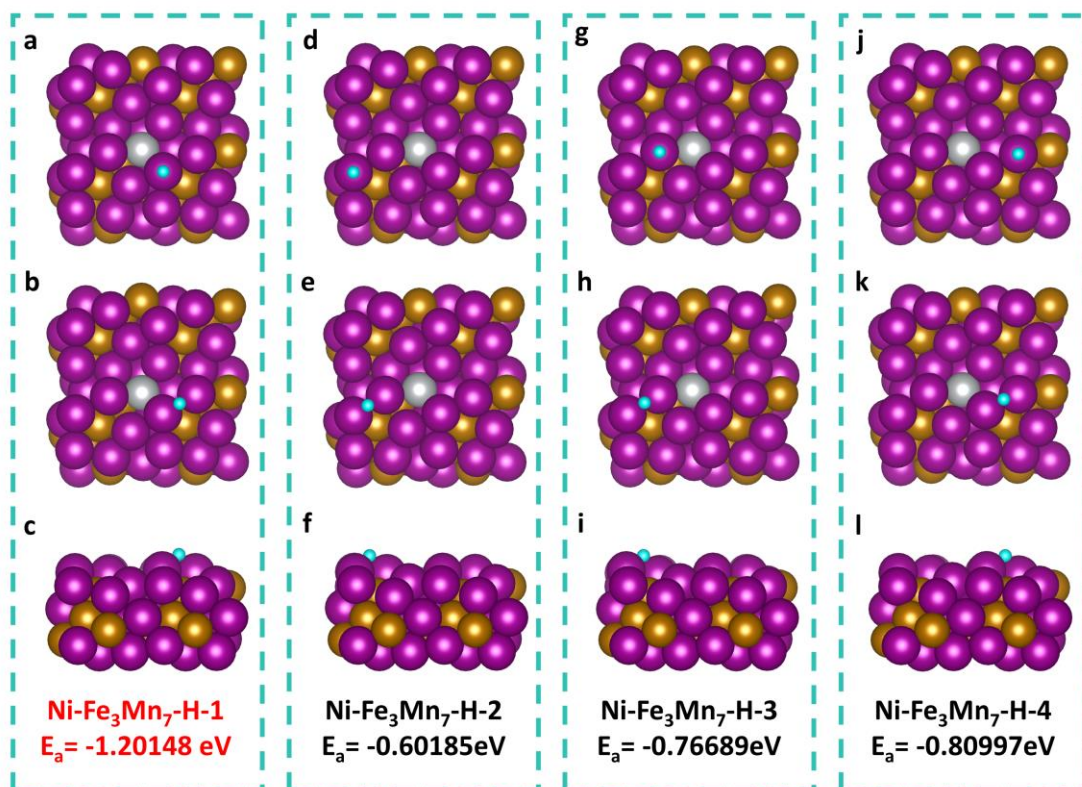

Fig. S15 (a, d, g, j)  $^*H$  adsorption models of  $Ni-Fe_3Mn_7$  on different metal sites. (b, e, h, k) Top view of optimized  $^*H$  adsorption models. (c, f, i, l) Front view and corresponding adsorption energies of optimized  $^*H$  adsorption models.

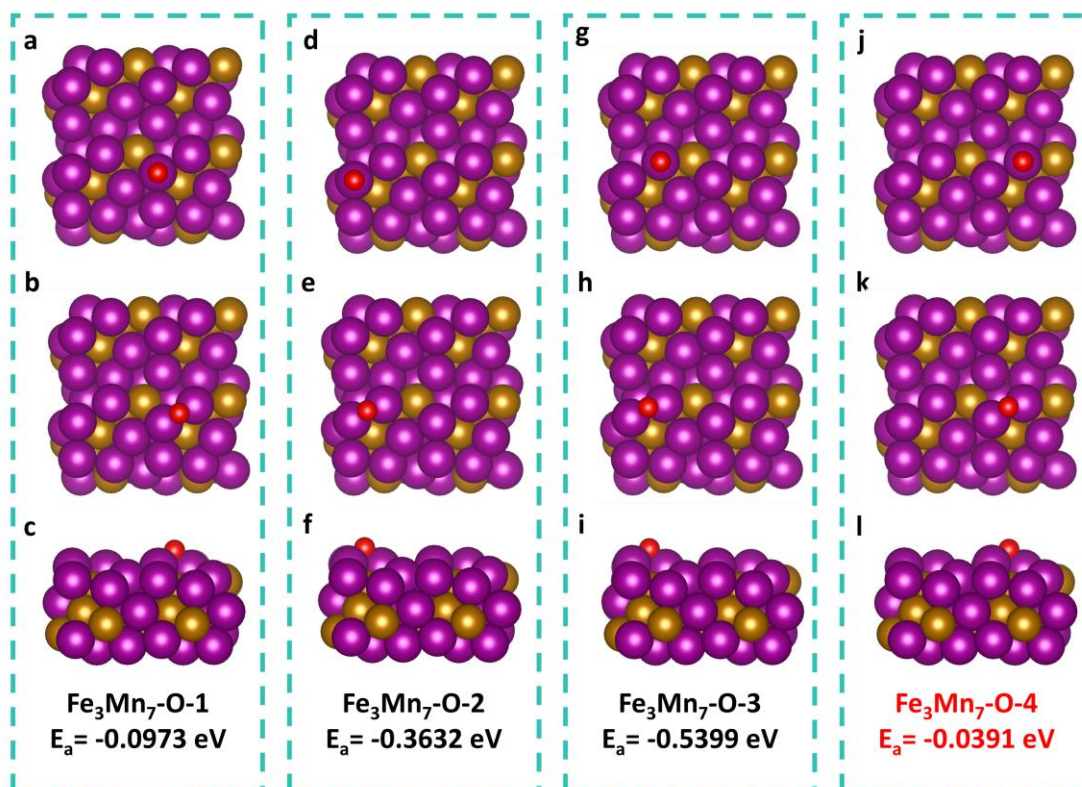

Fig. S16 (a, d, g, j) \*O adsorption models of Fe<sub>3</sub>Mn<sub>7</sub> on different metal sites. (b, e, h, k) Top view of optimized \*O adsorption models. (c, f, i, l) Front view and corresponding adsorption energies of optimized \*O adsorption models.

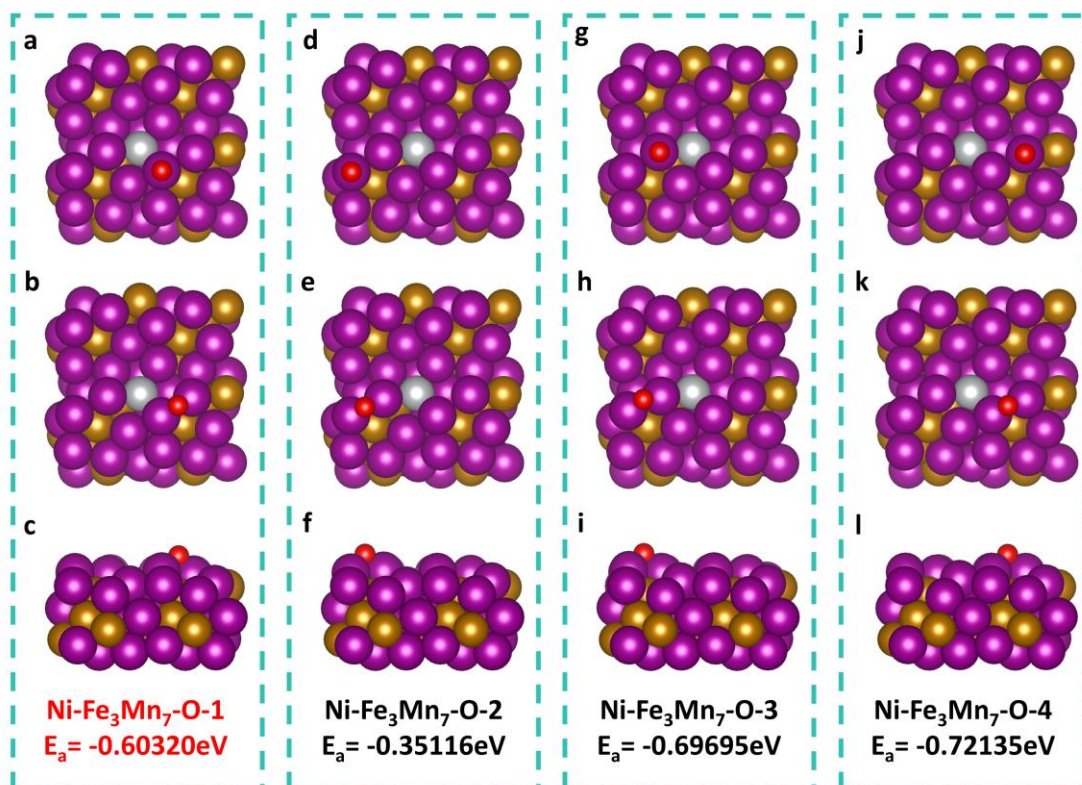

Fig. S17 (a, d, g, j) \*O adsorption models of Ni-Fe<sub>3</sub>Mn<sub>7</sub> on different metal sites. (b, e, h, k) Top view of optimized \*O adsorption models. (c, f, i, l) Front view and corresponding adsorption energies of optimized \*O adsorption models.

Table S1. Elemental compositions of D-MnNiFe-0, D-MnNiFe-30, and D-MnNiFe-60 determined by ICP-OES analysis.

| Sample      | Element | Content in sample (wt%) |
|-------------|---------|-------------------------|
| D-MnNiFe-0  | Mn      | 64.42                   |
|             | Ni      | 11.24                   |
|             | Fe      | 21.00                   |
| D-MnNiFe-30 | Mn      | 49.85                   |
|             | Ni      | 15.54                   |
|             | Fe      | 25.03                   |
| D-MnNiFe-60 | Mn      | 68.38                   |
|             | Ni      | 10.82                   |
|             | Fe      | 19.84                   |

Table S2. XPS peak-fitting parameters for Fe, Mn, and Ni species in D-MnNiFe-30.

|                                    | Peak BE | Area     | Area Ratio |
|------------------------------------|---------|----------|------------|
| Fe <sup>3+</sup> 2p <sub>3/2</sub> | 713.07  | 35226.14 | 18.68%     |
| Fe <sup>2+</sup> 2p <sub>1/2</sub> | 724.23  | 20423.23 | 10.83%     |
| Fe <sup>0</sup> 2p <sub>3/2</sub>  | 707     | 26135.14 | 13.86%     |
| Fe <sup>0</sup> 2p <sub>1/2</sub>  | 719.72  | 20862.88 | 11.06%     |
| Fe <sup>3+</sup> 2p <sub>1/2</sub> | 726.34  | 14767.58 | 7.83%      |
| Sat. 2p <sub>1/2</sub>             | 733.82  | 3375.72  | 1.79%      |
| Fe <sup>2+</sup> 2p <sub>3/2</sub> | 710.88  | 56299.42 | 29.85%     |
| Sat. 2p <sub>3/2</sub>             | 715.81  | 11532.28 | 6.11%      |
| Mn <sup>3+</sup> 2p <sub>3/2</sub> | 641.57  | 46650.27 | 18.95%     |
| Mn <sup>2+</sup> 2p <sub>3/2</sub> | 640.41  | 44632.74 | 18.13%     |
| Mn <sup>4+</sup> 2p <sub>3/2</sub> | 642.90  | 63224.59 | 25.68%     |
| Mn <sup>0</sup> 2p <sub>3/2</sub>  | 638.52  | 50629.51 | 20.57%     |
| Mn <sup>0</sup> 2p <sub>1/2</sub>  | 651.01  | 5078.23  | 2.06%      |
| Mn <sup>2+</sup> 2p <sub>1/2</sub> | 652.09  | 7834.83  | 3.18%      |
| Mn <sup>3+</sup> 2p <sub>1/2</sub> | 653.09  | 14950.43 | 6.07%      |
| Mn <sup>4+</sup> 2p <sub>1/2</sub> | 654.27  | 13160.44 | 5.35%      |
| Ni <sup>0</sup> 2p <sub>3/2</sub>  | 852.18  | 50006.55 | 30.07%     |
| Ni <sup>2+</sup> 2p <sub>3/2</sub> | 855.75  | 58716.35 | 35.31%     |
| Ni <sup>0</sup> 2p <sub>1/2</sub>  | 869.41  | 19988.52 | 12.02%     |
| Sat. 2p <sub>3/2</sub>             | 861.17  | 7706.18  | 4.63%      |
| Ni <sup>2+</sup> 2p <sub>1/2</sub> | 873.41  | 18962.38 | 11.40%     |
| Sat. 2p <sub>1/2</sub>             | 878.99  | 10912.52 | 6.56%      |

Table S3. Fitted EIS parameters ( $R_s$  and  $R_{ct}$ ) for the Catalysts under HER and OER conditions.

| Catalysts          | HER- $R_s / \Omega$ | HER- $R_{ct} / \Omega$ | OER- $R_s / \Omega$ | OER- $R_{ct} / \Omega$ |
|--------------------|---------------------|------------------------|---------------------|------------------------|
| <b>D-MnNiFe-0</b>  | 0.726               | 13.632                 | 1.2826              | 12.8                   |
| <b>D-MnNiFe-30</b> | 0.604               | 2.484                  | 0.57569             | 1.711                  |
| <b>D-MnNiFe-60</b> | 1.330               | 46.419                 | 0.87752             | 18.765                 |

Table S4. Comparison of the electrochemical HER activities of this work with recent outstanding reported D-MnNiFe-30 electrocatalysts under 1M alkaline conditions.

| Electrocatalyst                              | $\eta_{10}$ (mV) | Tafel slope<br>(mV dec <sup>-1</sup> ) | Reference        |
|----------------------------------------------|------------------|----------------------------------------|------------------|
| <b>D-MnNiFe-0</b>                            | <b>166</b>       | <b>107.5</b>                           |                  |
| <b>D-MnNiFe-30</b>                           | <b>32</b>        | <b>54.1</b>                            | <b>This work</b> |
| <b>D-MnNiFe-60</b>                           | <b>148</b>       | <b>60.9</b>                            |                  |
| P-CoN/CMO/Co <sub>3</sub> O <sub>4</sub> /NF | 109              | 89.1                                   | 1                |
| Pt-NiCoP/PRGF                                | 56               | 59                                     | 2                |
| Ag/NiFe-MOF-30                               | 138              | 57.4                                   | 3                |
| FeNNi <sub>3</sub> /NF                       | 57               | 109                                    | 4                |
| Co <sub>0.15</sub> @ARC                      | 172              | 108                                    | 5                |
| NCFP@LDH                                     | 46               | 65.95                                  | 6                |
| HEA-AO                                       | 173              | 97.89                                  | 7                |
| Ir@CoNi-BP900                                | 67.7             | 59.34                                  | 8                |
| CoO/CoP <sub>3</sub>                         | 205              | 137                                    | 9                |
| RuFeNiCo-NC-3                                | 60.7             | 51.9                                   | 10               |

Table S5. Comparison of the electrochemical OER activities of this work with recent outstanding reported D-MnNiFe-30 electrocatalysts under 1M alkaline conditions.

| Electrocatalyst                                         | $\eta_{10}$ (mV) | Tafel slope<br>(mV dec <sup>-1</sup> ) | Reference        |
|---------------------------------------------------------|------------------|----------------------------------------|------------------|
| <b>D-MnNiFe-0</b>                                       | <b>461</b>       | <b>75.2</b>                            |                  |
| <b>D-MnNiFe-30</b>                                      | <b>323</b>       | <b>63.3</b>                            | <b>This work</b> |
| <b>D-MnNiFe-60</b>                                      | <b>361</b>       | <b>84.7</b>                            |                  |
| RuFeNiCo-NC-3                                           | 330              | 53.88                                  | 10               |
| CV@MWCNT                                                | 337              | 80                                     | 11               |
| Mn-Co <sub>1.29</sub> Ni <sub>1.71</sub> O <sub>4</sub> | 334.3            | 76.7                                   | 12               |
| CoFe/CoFe <sub>2</sub> O <sub>4</sub> @NCNTs            | 344              | 143.8                                  | 13               |
| LDH-A-Fe/NC-CNT                                         | 360              | 107                                    | 14               |
| ZCO-C                                                   | 330              | 59.7                                   | 15               |
| n#CMS                                                   | 345              | 80.89                                  | 16               |
| FeCoNiCrZnCu                                            | 357              | 94                                     | 17               |
| Fe <sub>2</sub> Co/C                                    | 335              | 58.8                                   | 18               |
| CuO/CuNb <sub>2</sub> O <sub>6</sub>                    | 380              | 104                                    | 19               |

Table S6. AWE activities of D-MnNiFe-30 || D-MnNiFe-30 couple along with other reported catalysts under 1M alkaline conditions.

| Couple                                                                        | Cell voltage (V)                   | Condition          | Reference        |
|-------------------------------------------------------------------------------|------------------------------------|--------------------|------------------|
| <b>D-MnNiFe-30   <br/>D-MnNiFe-30</b>                                         | <b>1.83V@100mA cm<sup>-2</sup></b> | <b>25°C 1M KOH</b> | <b>This work</b> |
| CoCrFeNiMoAl <sub>0.6</sub>   <br>CoCrFeNiMoAl <sub>0.6</sub>                 | 1.83V@100mA cm <sup>-2</sup>       | 25°C 1M KOH        | 20               |
| NiSe <sub>2</sub> /CoSe/NF-3.0   <br>NiSe <sub>2</sub> /CoSe/NF-3.0           | 1.85V@100mA cm <sup>-2</sup>       | 25°C 1M KOH        | 21               |
| 4N <sub>6</sub> Co-MoS <sub>2</sub>   <br>4N <sub>6</sub> Co-MoS <sub>2</sub> | 2.2V@100mA cm <sup>-2</sup>        | 25°C 1M KOH        | 22               |
| NiP-Fabric   <br>NiP-Fabric                                                   | 1.86V@100mA cm <sup>-2</sup>       | 25°C 1M KOH        | 23               |
| NCSO-60/NF   <br>NCSO-60/NF                                                   | 1.87V@100mA cm <sup>-2</sup>       | 25°C 1M KOH        | 24               |

## References

- 1 J. Ran, Z. Zhang, H. Feng, *et al.*, *Int. J. Hydrogen Energy*, 2024, **64**, 935-946.
- 2 D. Li, F. Kong, B. Sun, *et al.*, *Int. J. Hydrogen Energy*, 2025, **120**, 412-421.
- 3 C. Zhang, H. Chen, C. Zhou, *et al.*, *ACS Appl. Nano Mater.*, 2025, **8**, 6897-6906.
- 4 A. Zhou, D. Song, Z. Hui, *et al.*, *Results Phys.*, 2024, **59**, 107611.
- 5 Y. Zhou, Y. Luo, Q. Li, *et al.*, *Energy Fuels*, 2024, **38**, 15560-15570.
- 6 X. Fu, H. Liao, Z. Zhang, *et al.*, *Chem. Eng. J.*, 2025, **505**, 159520.
- 7 Y.X. Yu, J.L. Xu, L.W. Zhang, *et al.*, *Int. J. Hydrogen Energy*, 2024, **72**, 209-219.
- 8 L. Zhu, Y. Cheng, Y. Gong, *Int. J. Hydrogen Energy*, 2025, **97**, 1177-1186.
- 9 Y. Luo, G. Zhang, Y. Wang, *et al.*, *Sep. Purif. Technol.*, 2025, **363**, 132318.
- 10 Q. Lei, K. Zhu, L. Zuo, *et al.*, *Mater. Sci. Eng. B*, 2024, **314**, 118036.
- 11 V. Singh, S. Singh, V. Rathour, *et al.*, *ACS Appl. Eng. Mater.*, 2025, **3**, 672-683.
- 12 Y. Cheng, X. Guo, Z. Ma, *et al.*, *Molecules*, 2025, **30**, 1162.
- 13 Z. Zhang, M. Yan, Z. Xiong, *et al.*, *J. Energy Storage*, 2024, **101**, 113668.
- 14 W.H. Wang, C.H. Han, W.X. Hong, *et al.*, *J. Energy Storage*, 2024, **85**, 111058.
- 15 G. Arulprakash, A. Kareem, S. Sellappan, *et al.*, *Int. J. Hydrogen Energy*, 2024, **66**, 625-635.
- 16 T. Zeng, J. Lin, B. Wang, *et al.*, *Chem. Eng. J.*, 2024, **500**, 156788.
- 17 M. Li, X. Ye, S. Guo, *et al.*, *Int. J. Hydrogen Energy*, 2025, **130**, 644-653.
- 18 J. Guo, Y. Gao, X. Cao, *et al.*, *Inorg. Chem. Commun.*, 2024, **170**, 113394.
- 19 H.P.A. Alves, T.O. Pereira, R.A. Raimundo, *et al.*, *J. Phys. Chem. Solids*, 2025, **199**, 112525.
- 20 Y. Sun, F. Yang, S. Sun, *et al.*, *J. Colloid Interface Sci.*, 2025, **684**, 1-10.
- 21 X. Huo, Y. Zhang, G. Zhou, *et al.*, *J. Alloys Compd.*, 2025, **1026**, 180461.
- 22 X. Zhao, Z. Shang, N. Li, *et al.*, *J. Colloid Interface Sci.*, 2025, **693**, 137642.
- 23 P.J. Sharma, K.H. Modi, P. Sahatiya, *et al.*, *Appl. Surf. Sci.*, 2024, **644**, 158766.
- 24 S. Rajalekshmi, L. Kanishga, S.M. Senthil Kumar, *et al.*, *J. Power Sources*, 2025, **657**, 238182.
